# Supplementary material for: Generation of functionalized aryl and heteroaryl aluminum reagents by halogen–lithium exchange
Source: Royal Society of Chemistry journal article supplement (doi:10.1039/c3cc43356k), 2013-01-01

# **Generation of Functionalized Aryl and Heteroaryl Aluminum Reagents by Halogen/Lithium Exchange**

Thomas Klatt, Klaus Groll and Paul Knochel

Department Chemie, Ludwig-Maximilians-Universität München,  
Butenandtstr. 5-13, 81377 München, Germany.

[paul.knochel@cup.uni-muenchen.de](mailto:paul.knochel@cup.uni-muenchen.de)

**Supporting Information**

**NMR Spectra**

### Compound 5b

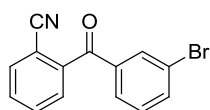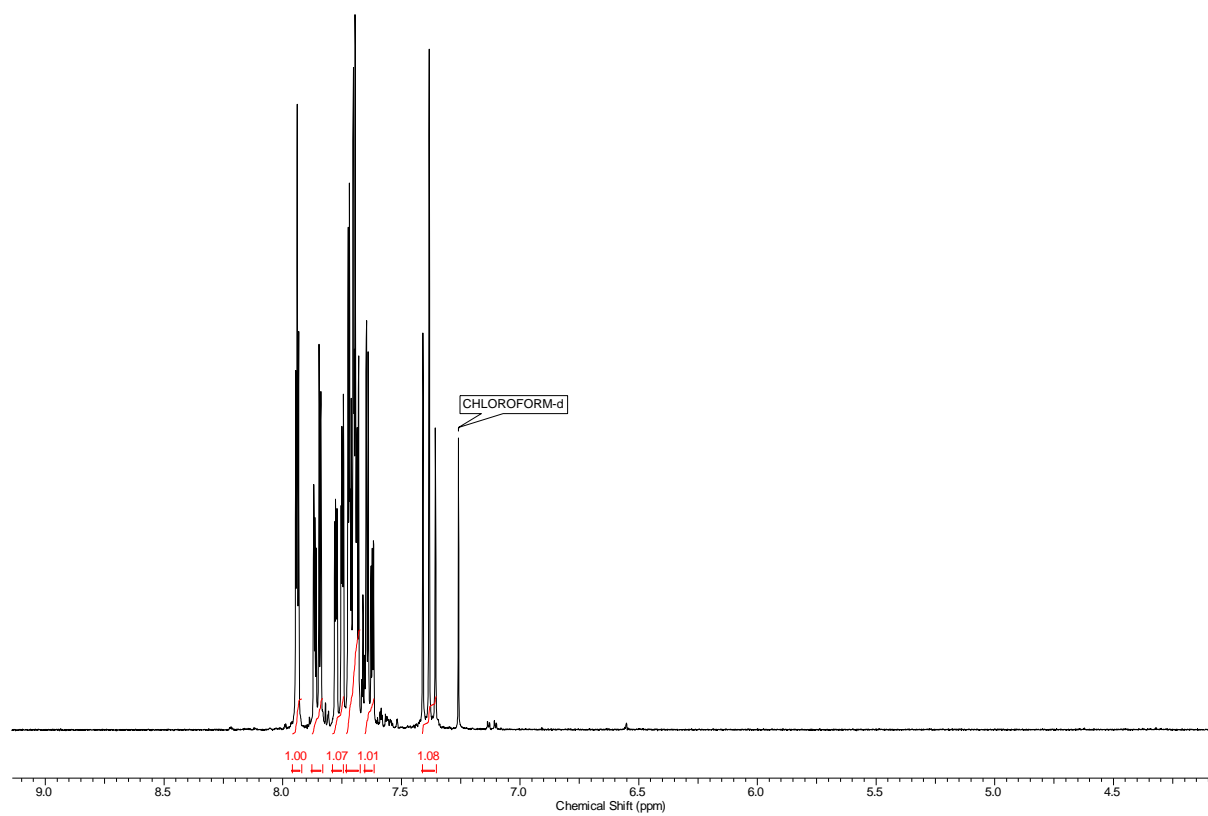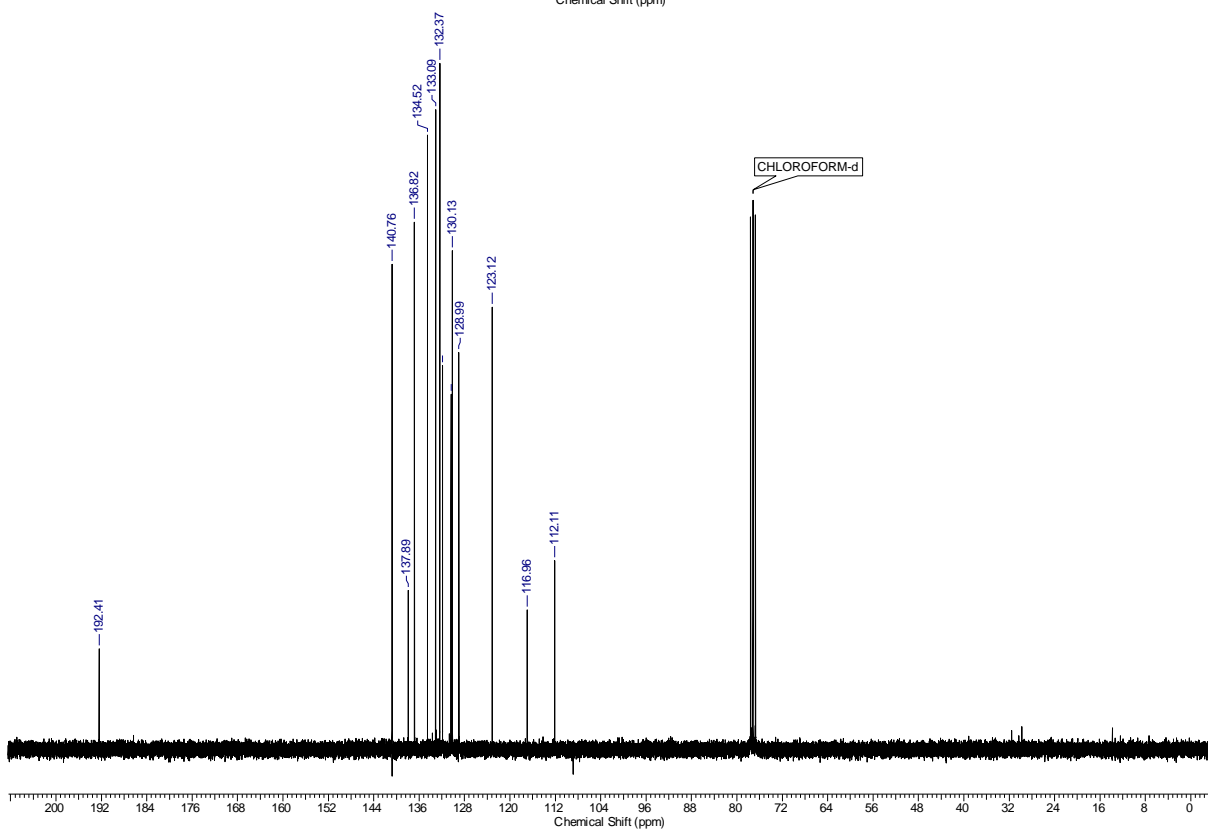

### Compound 5c

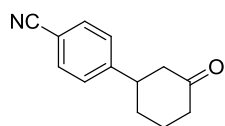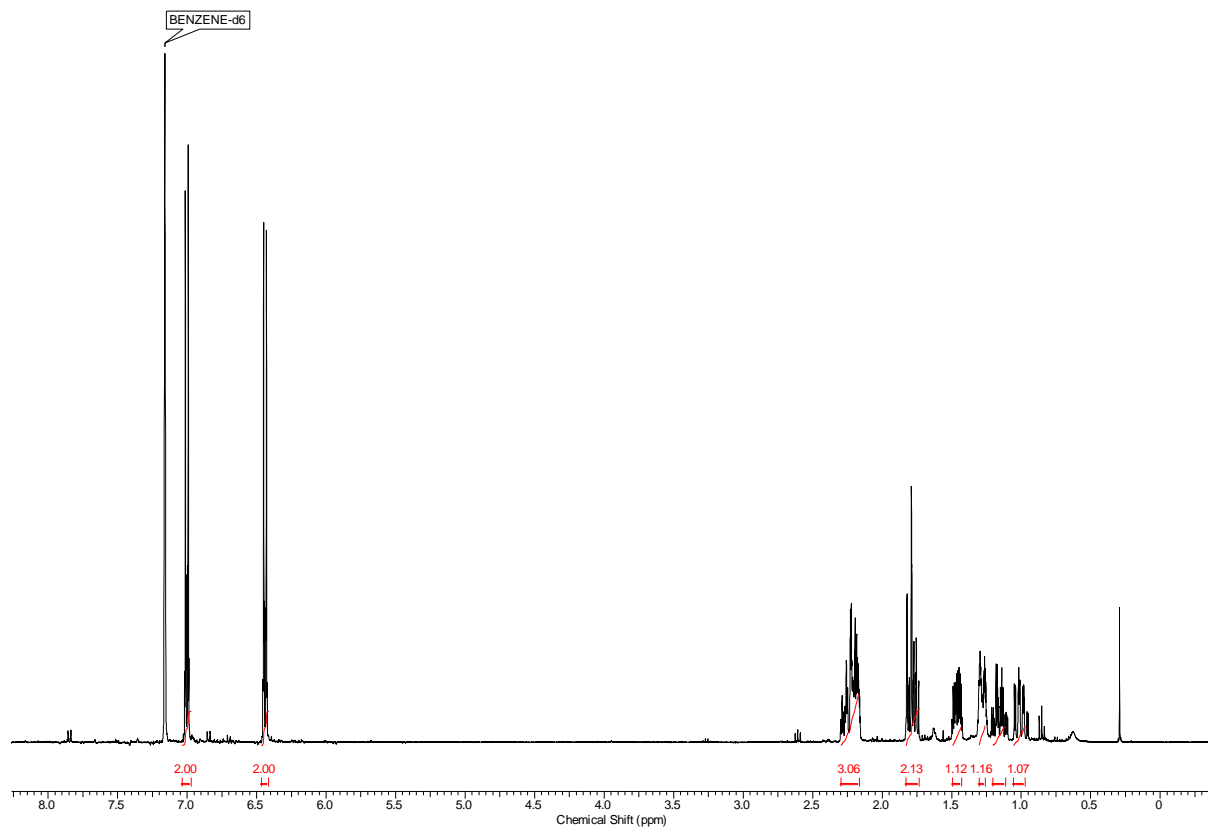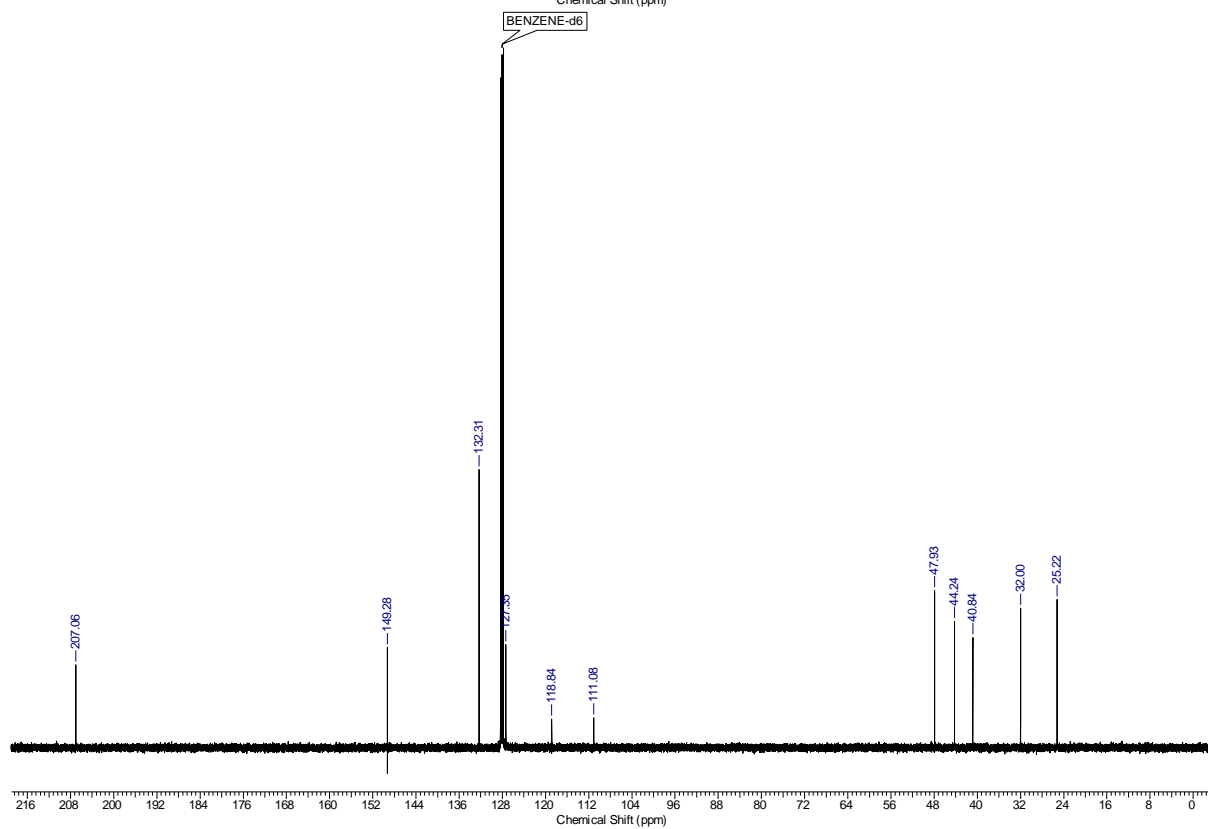

### Compound 5d

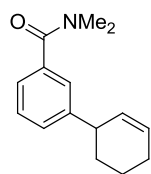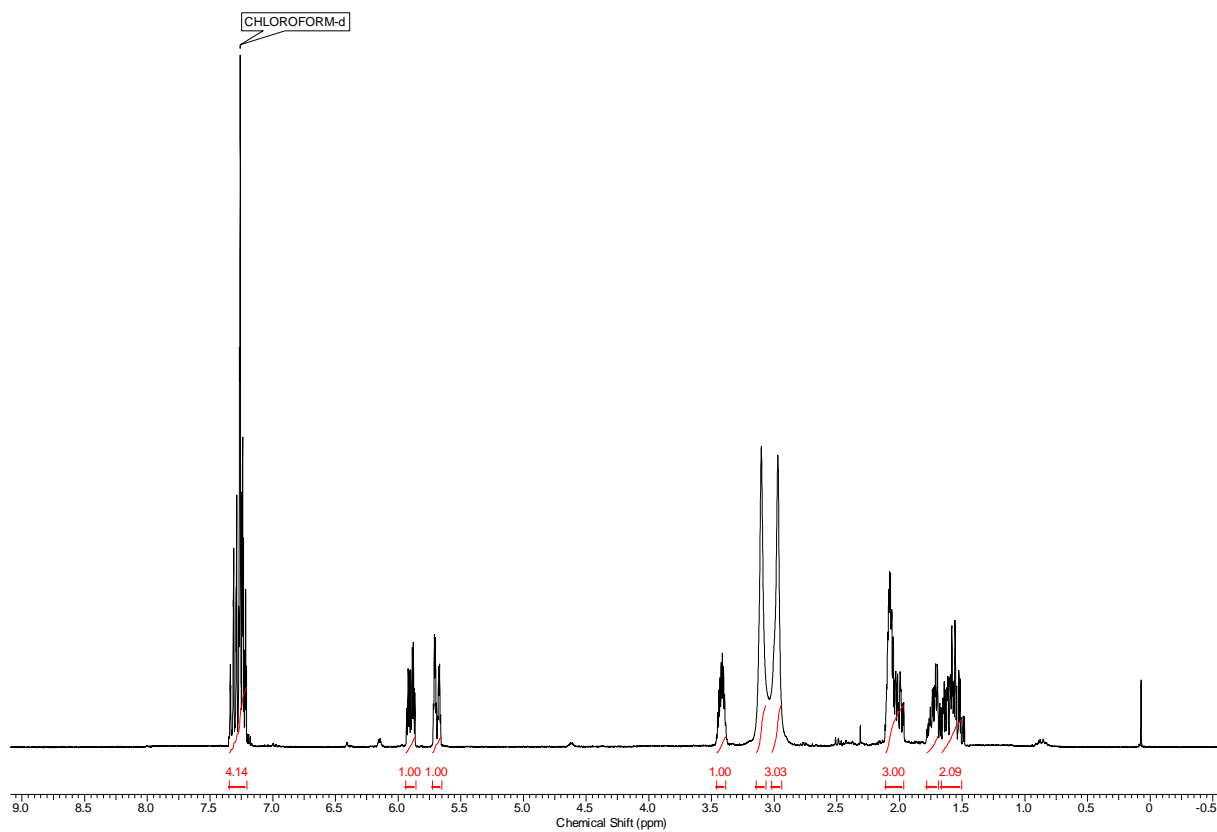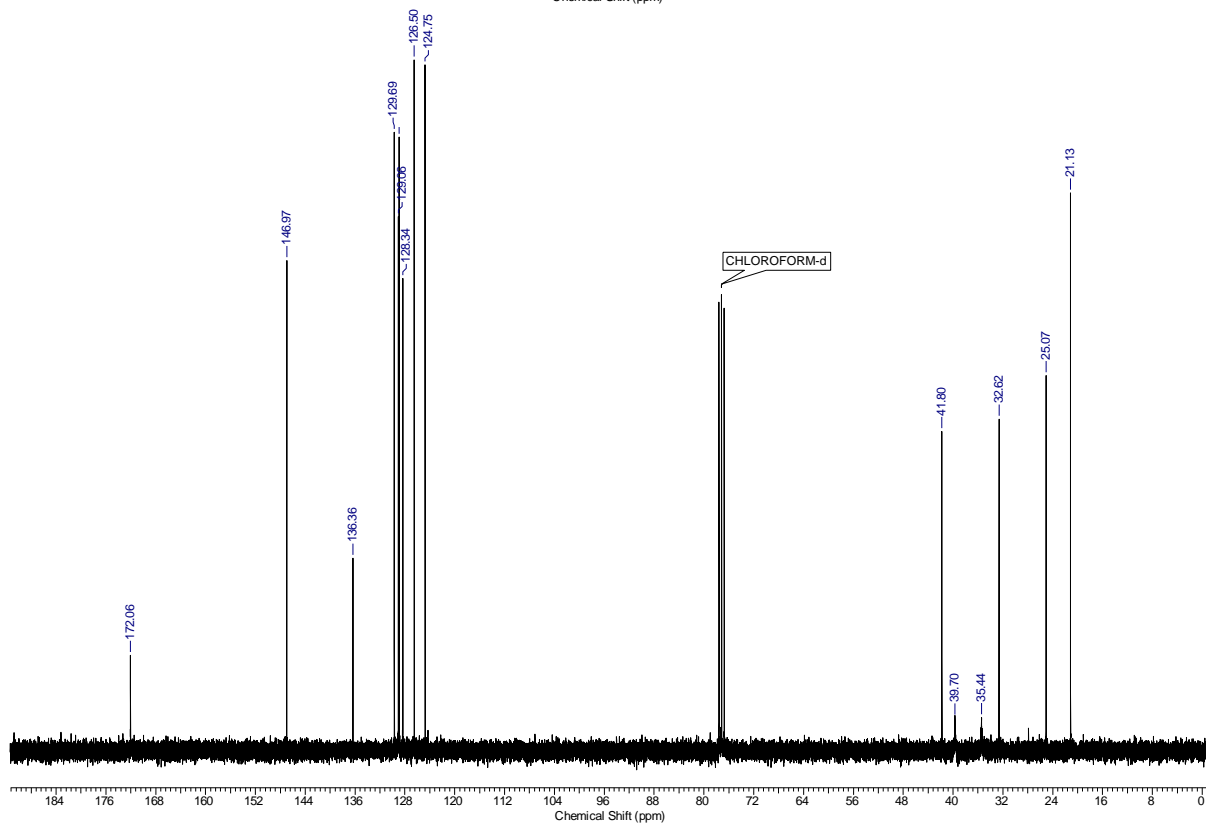

### Compound 5e

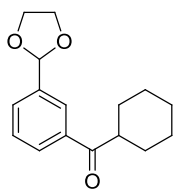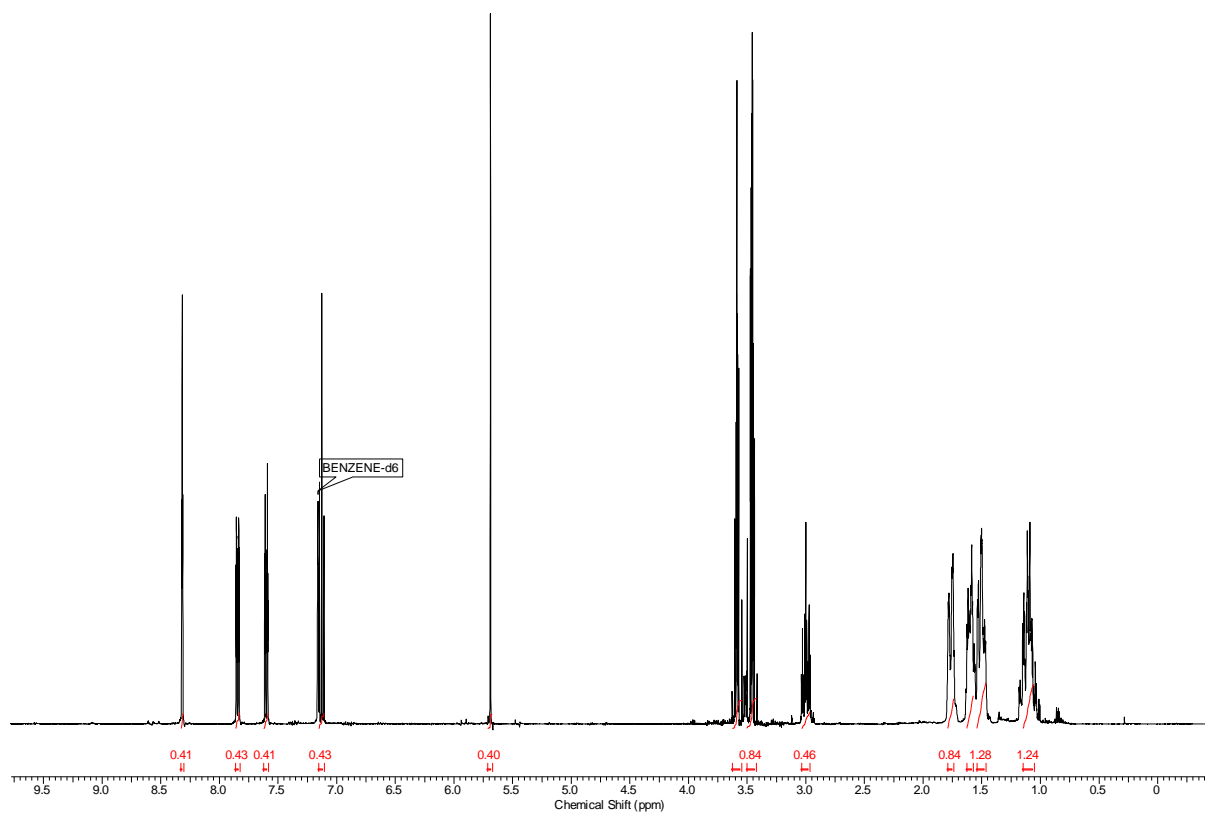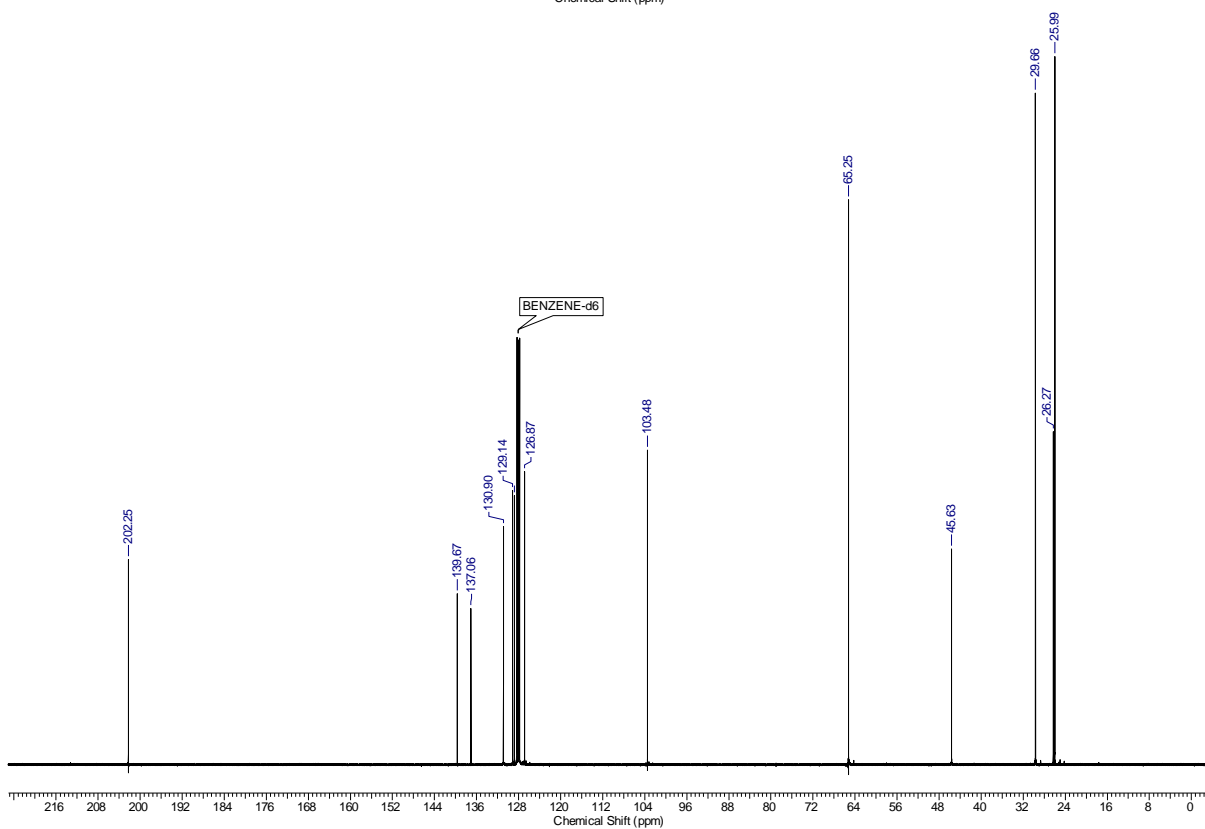

### Compound 5f

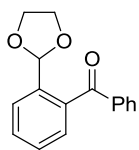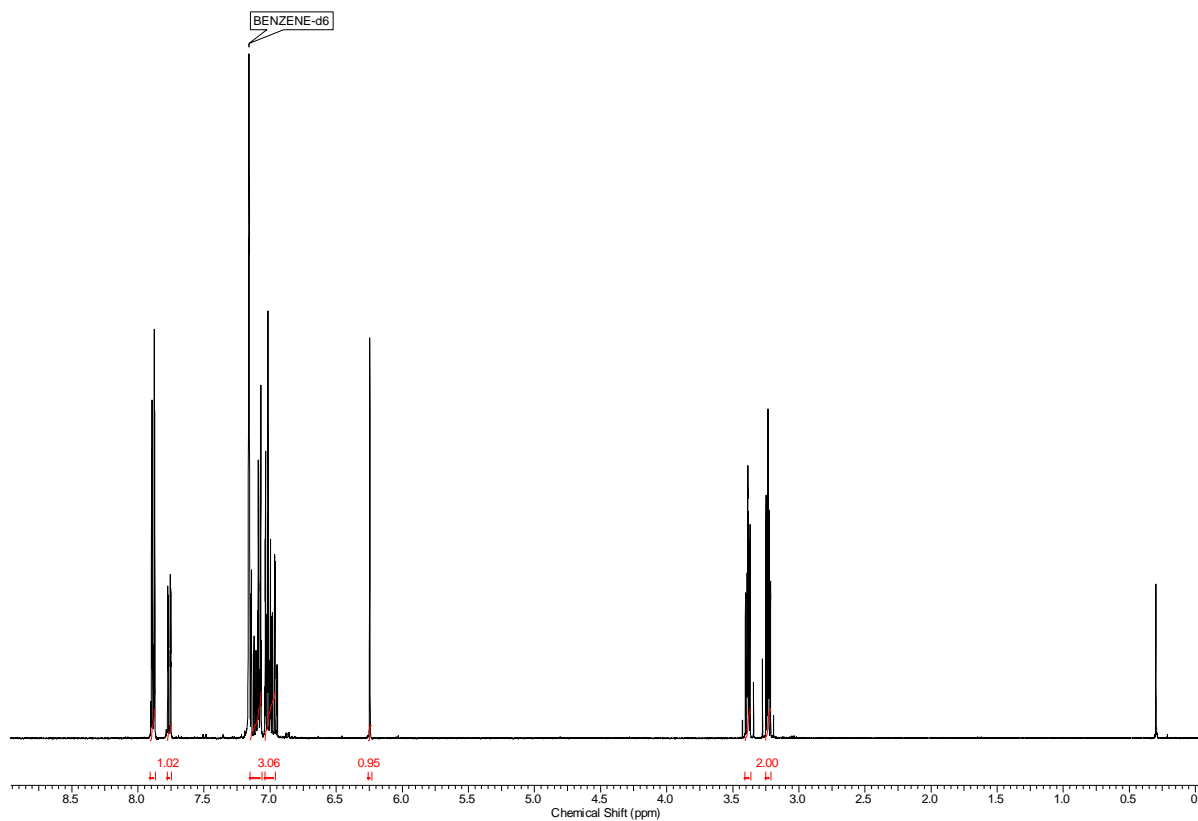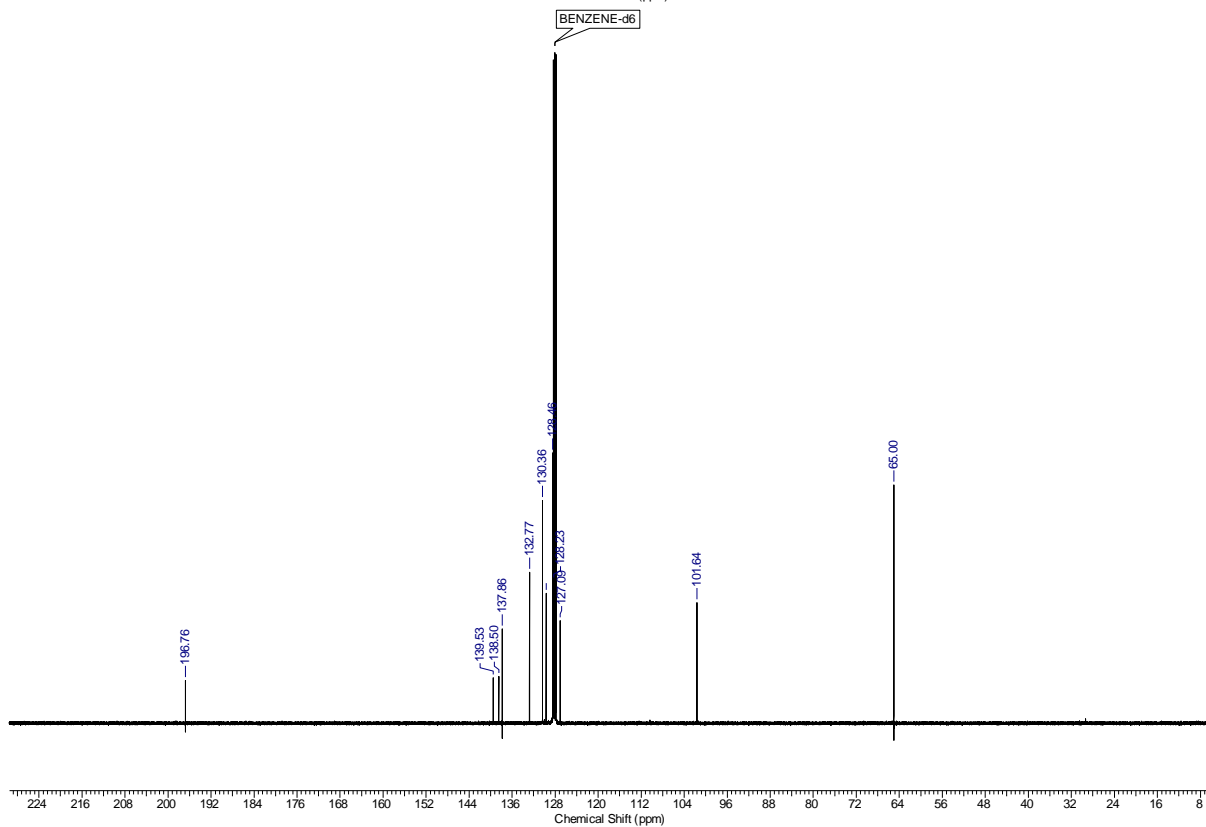

### Compound 5g

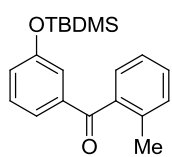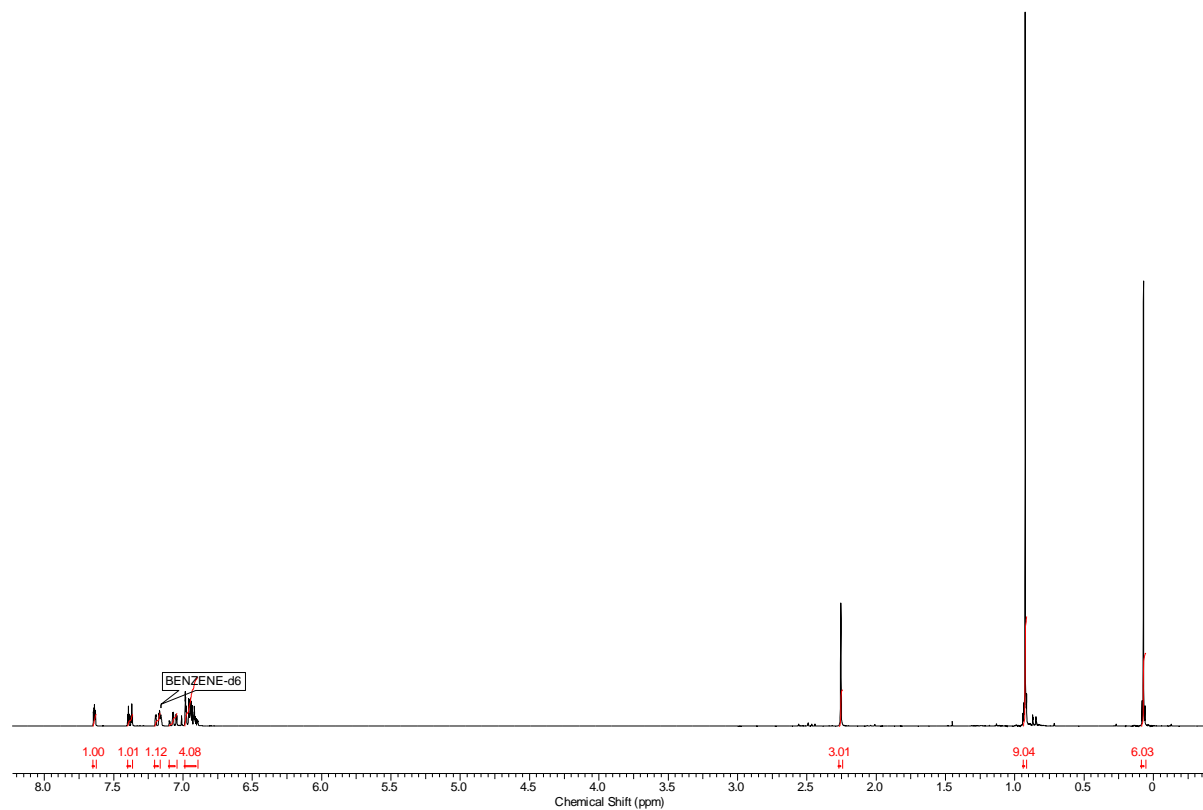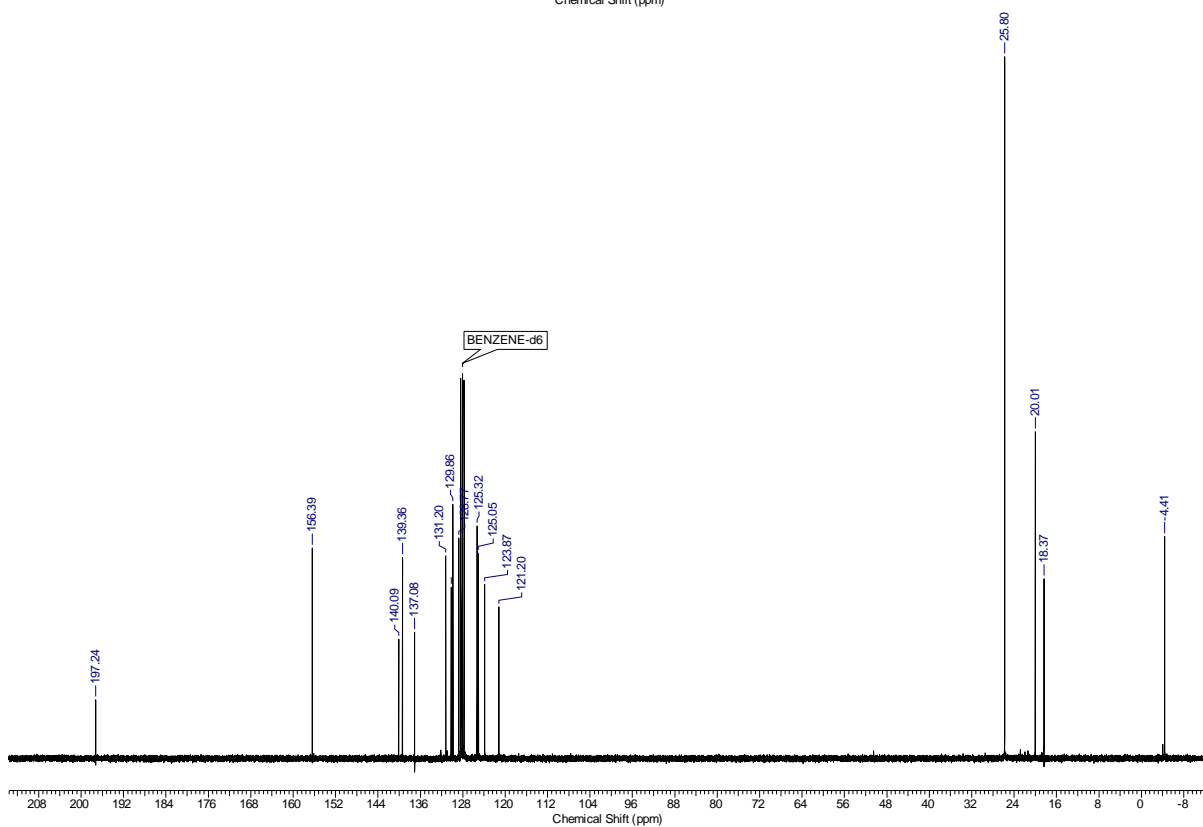

### Compound 5h

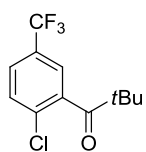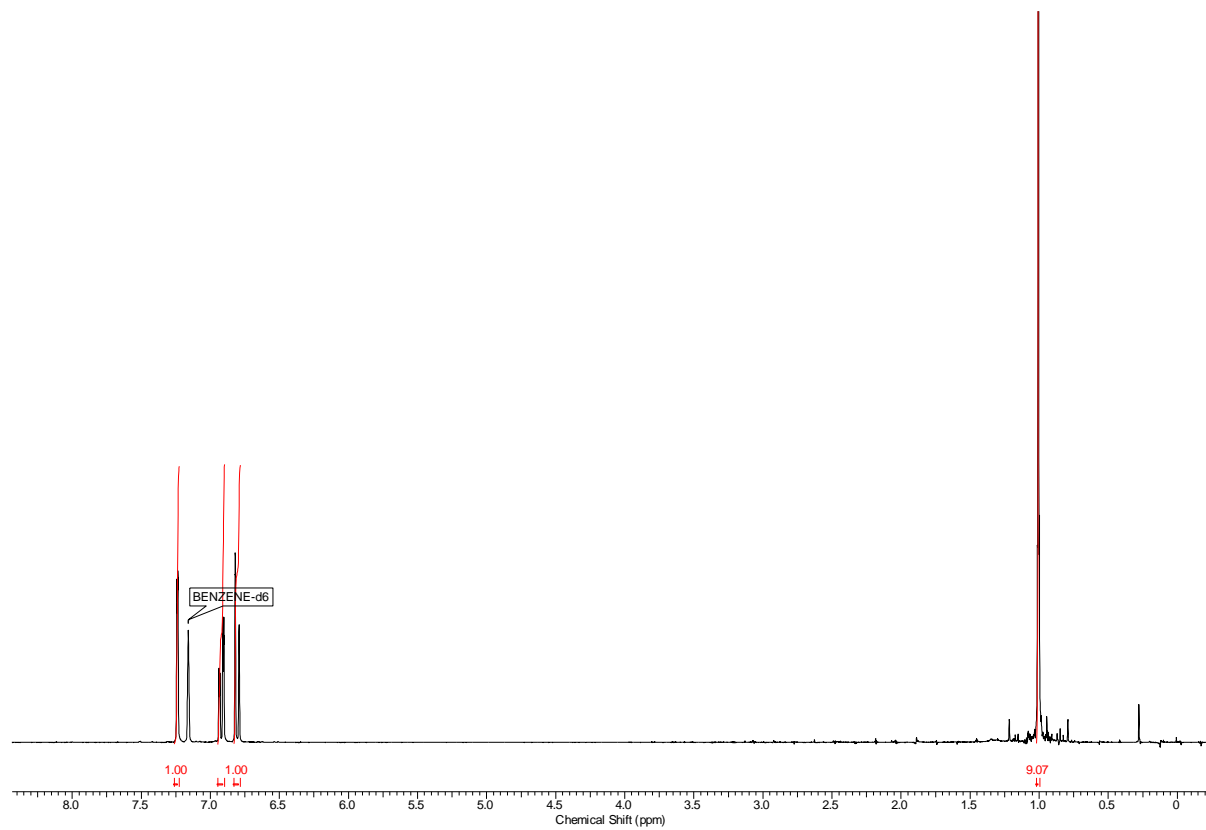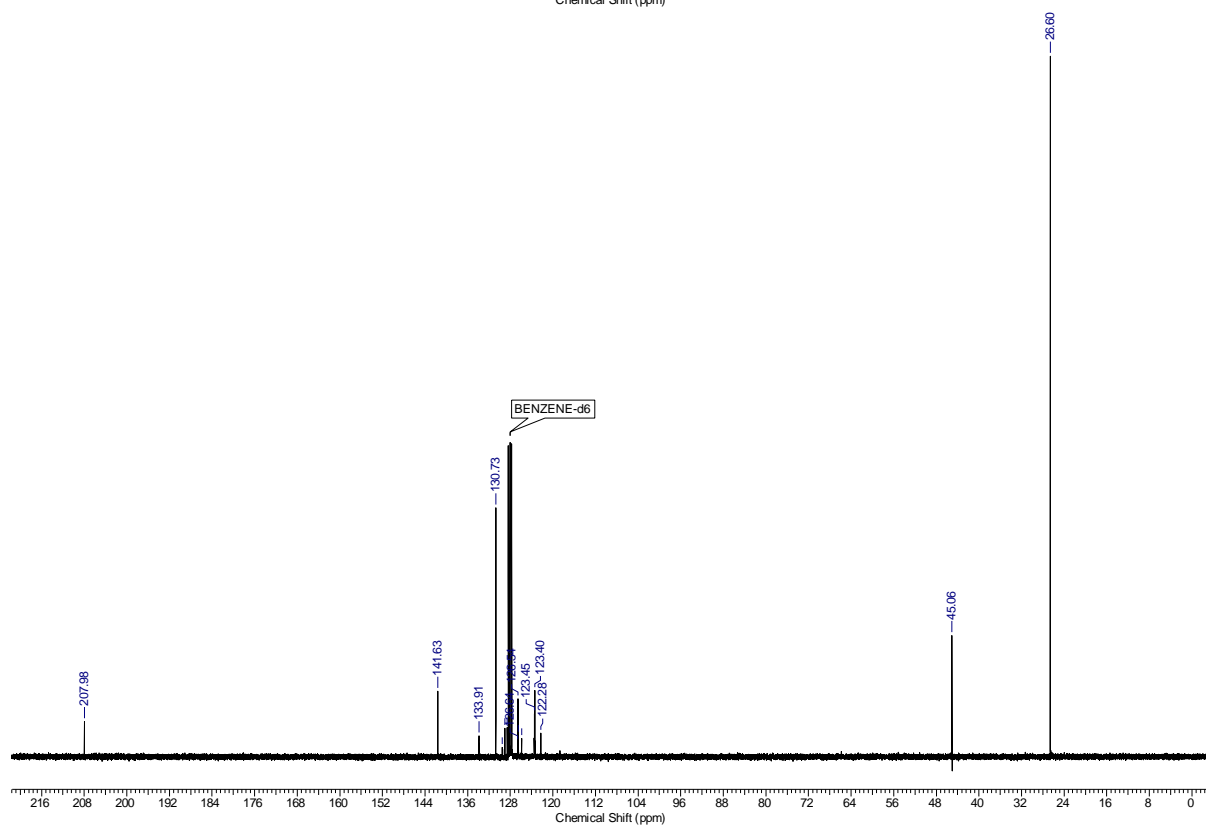



### Compound 5j

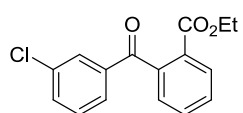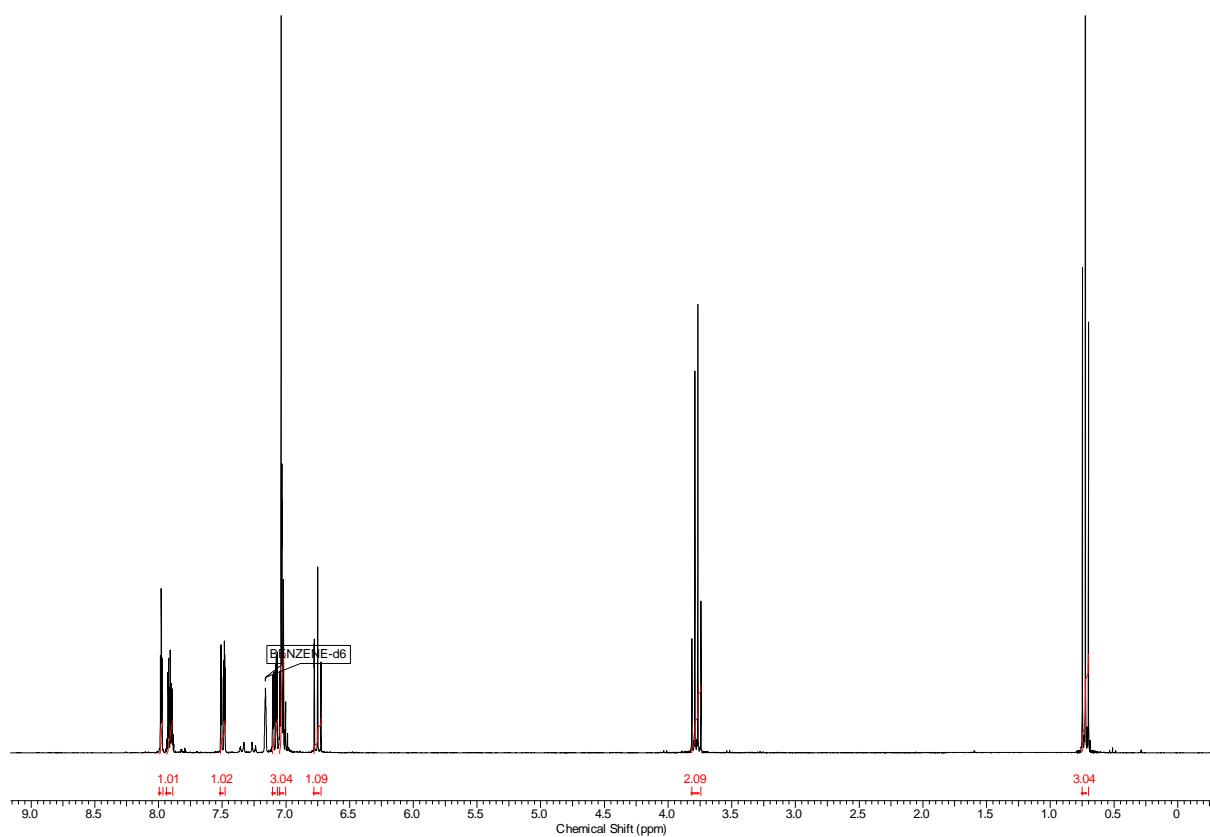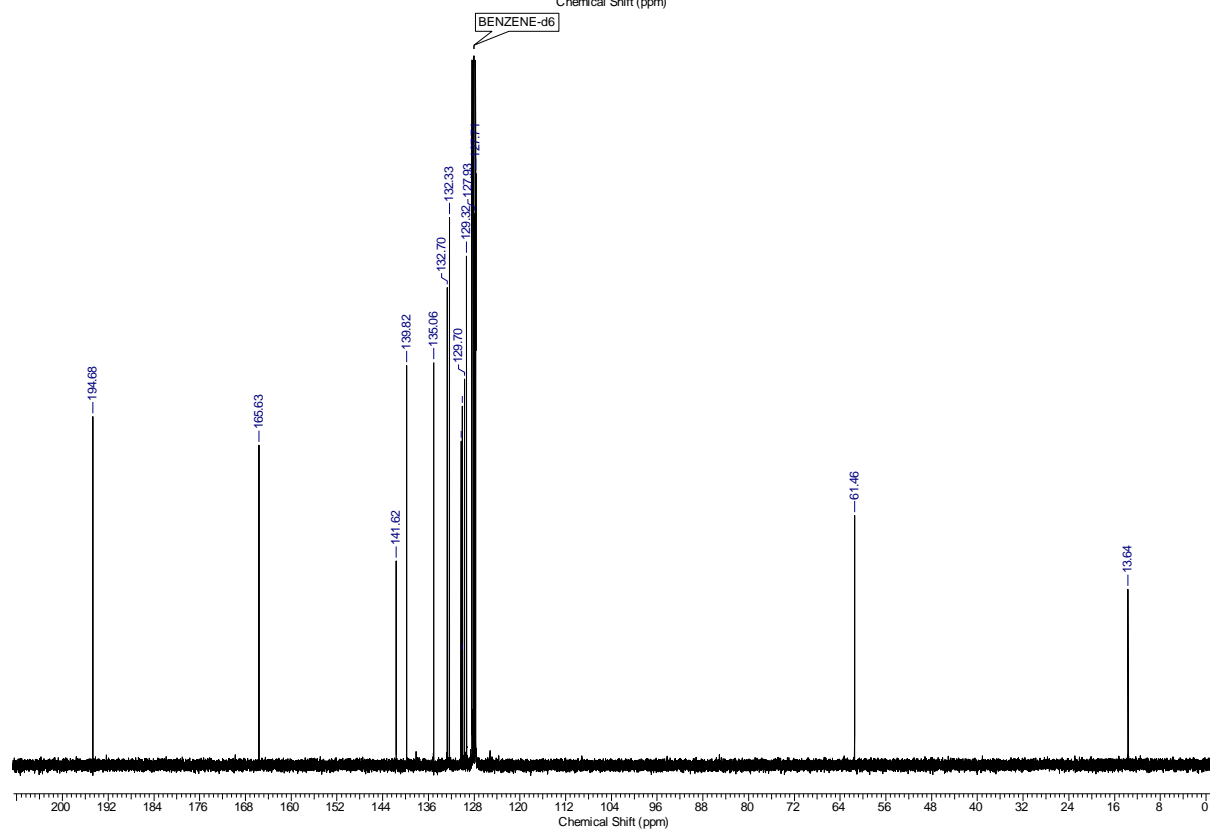

### Compound 9b

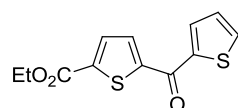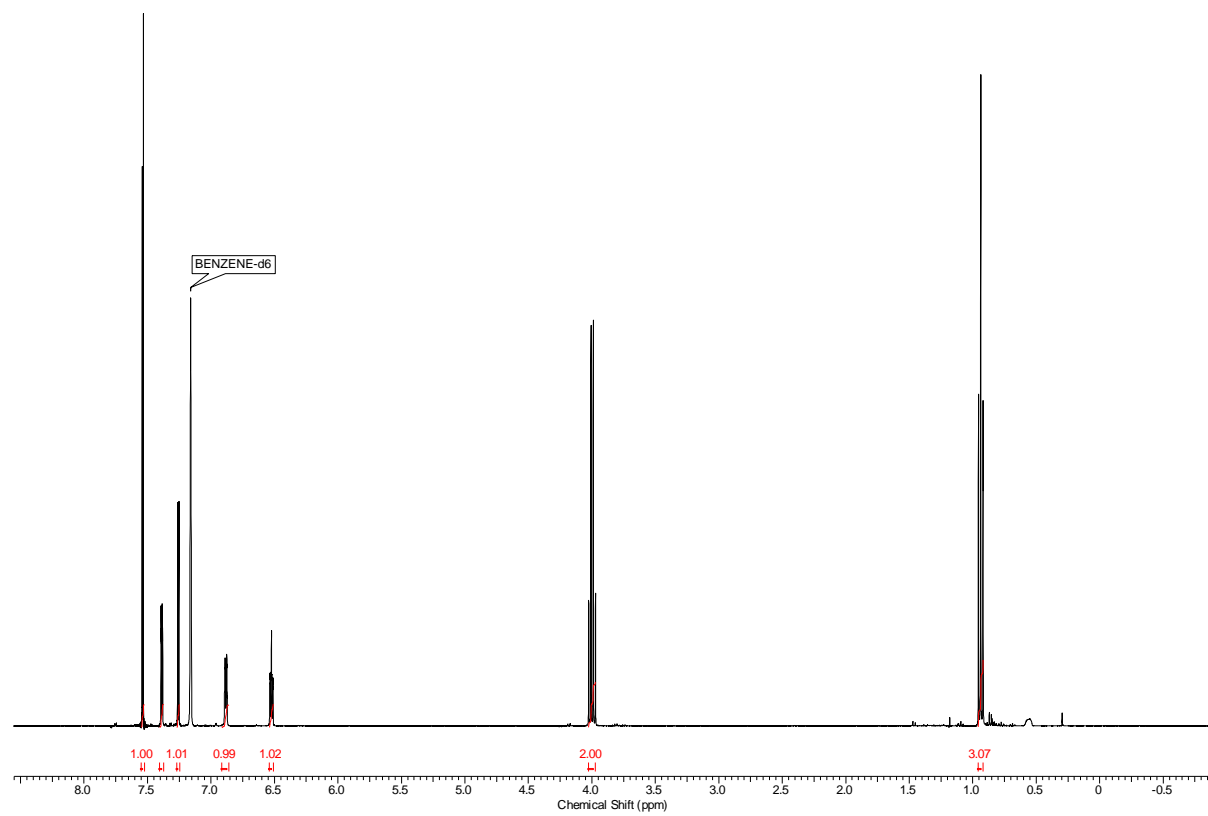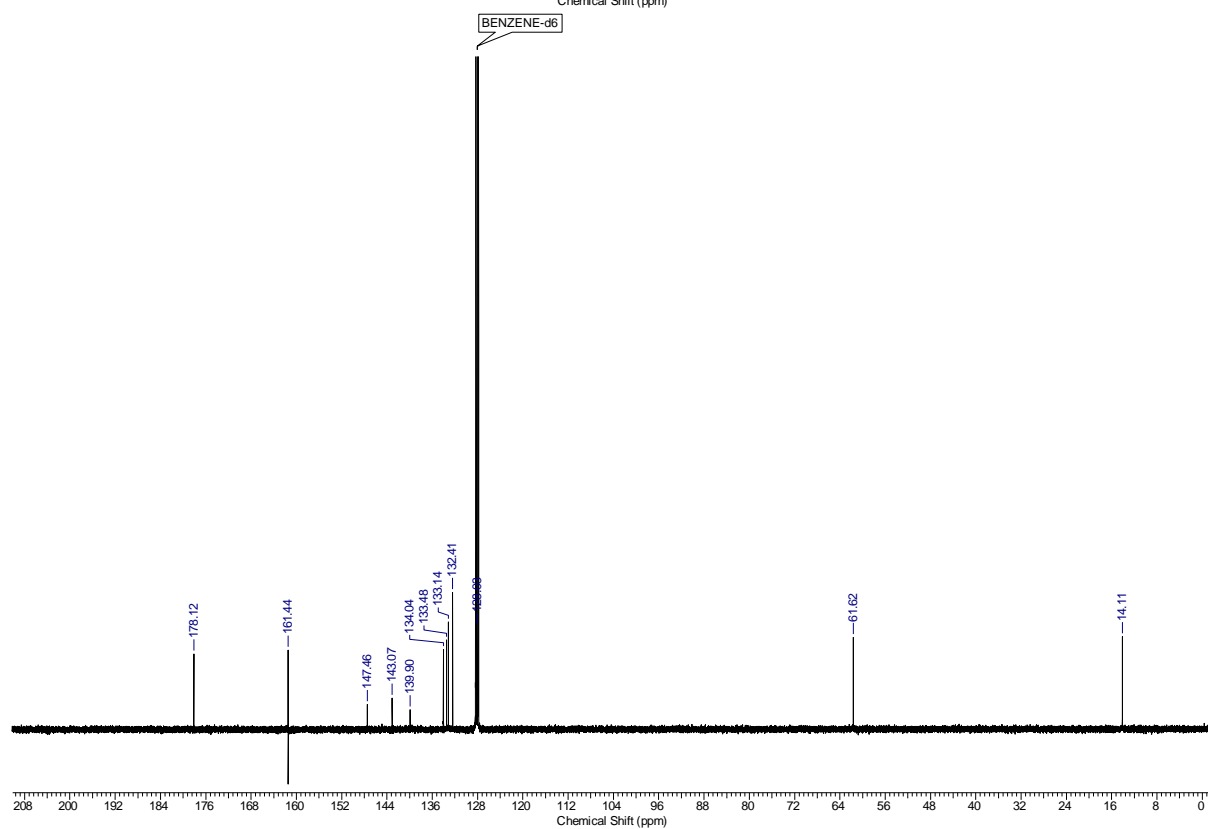

### Compound 9c

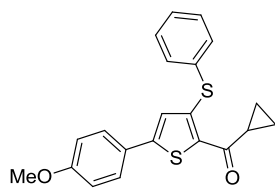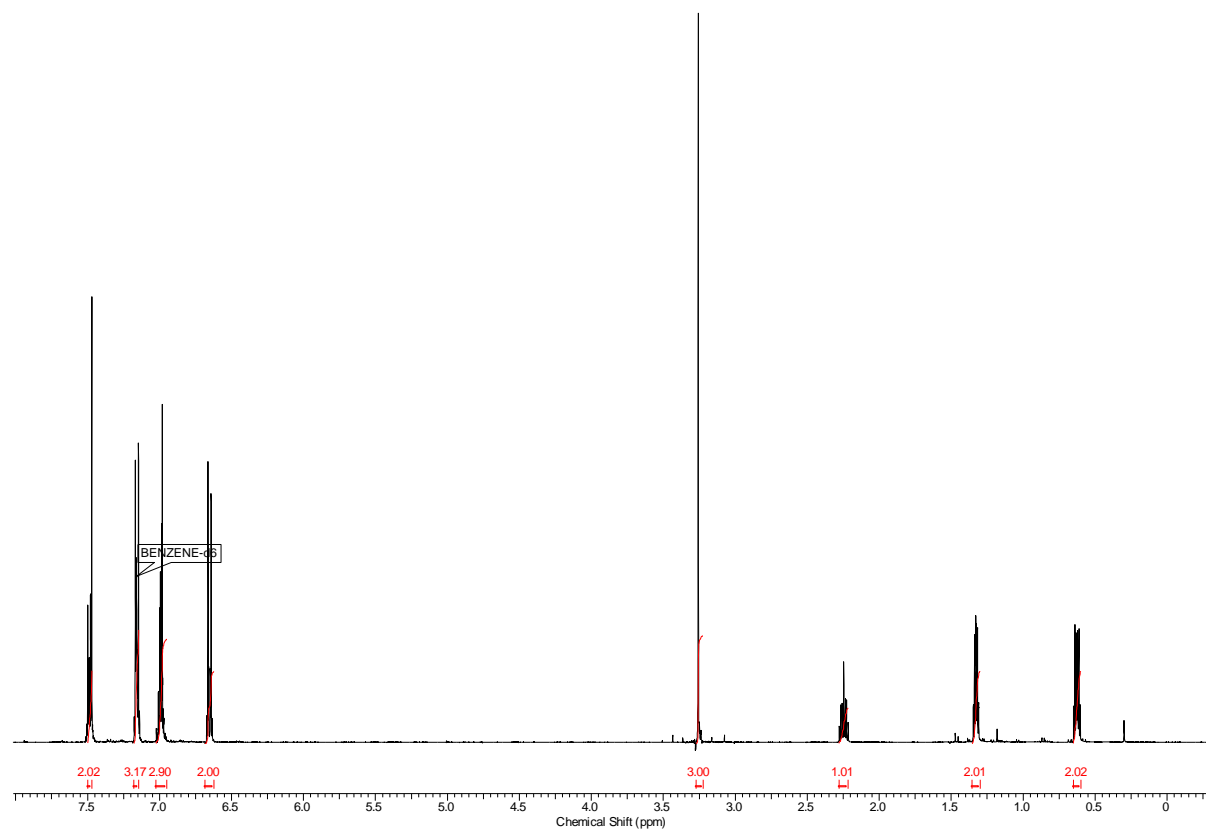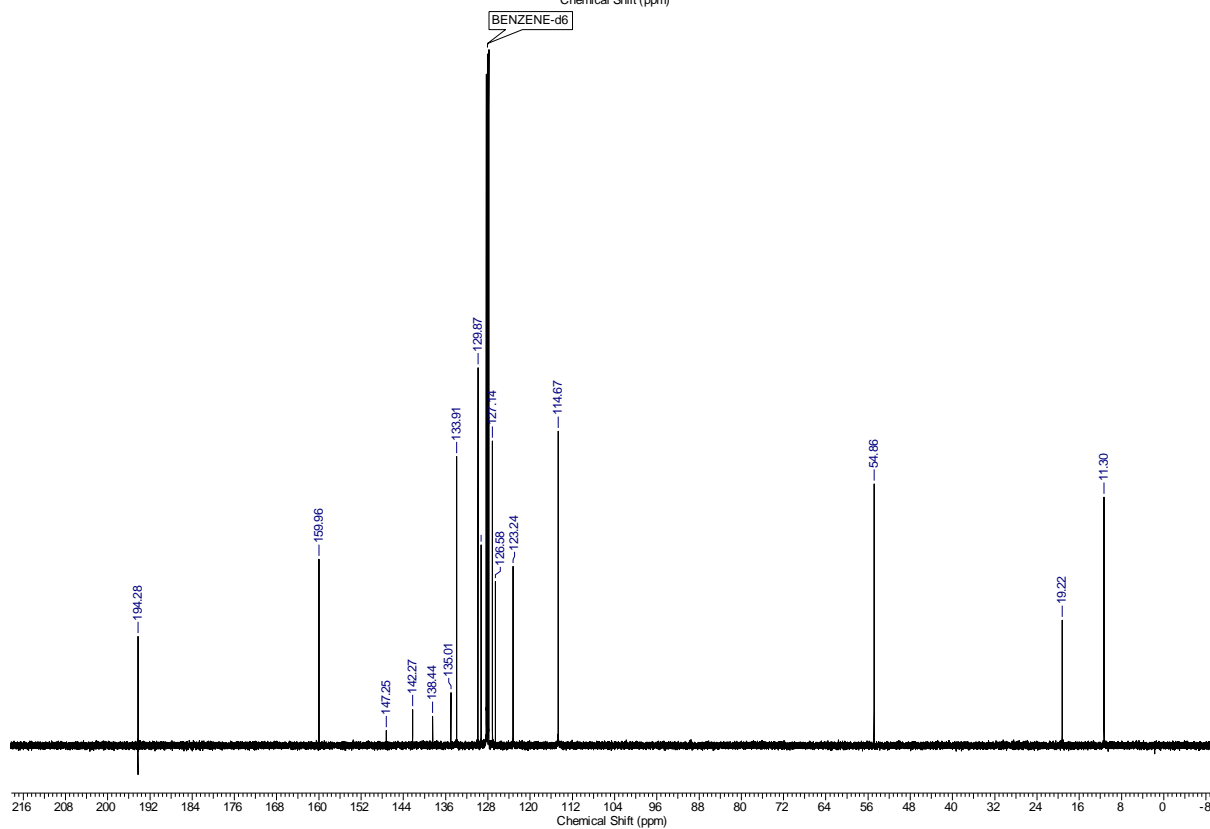

### Compound 10

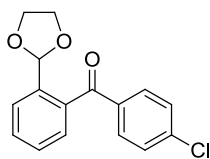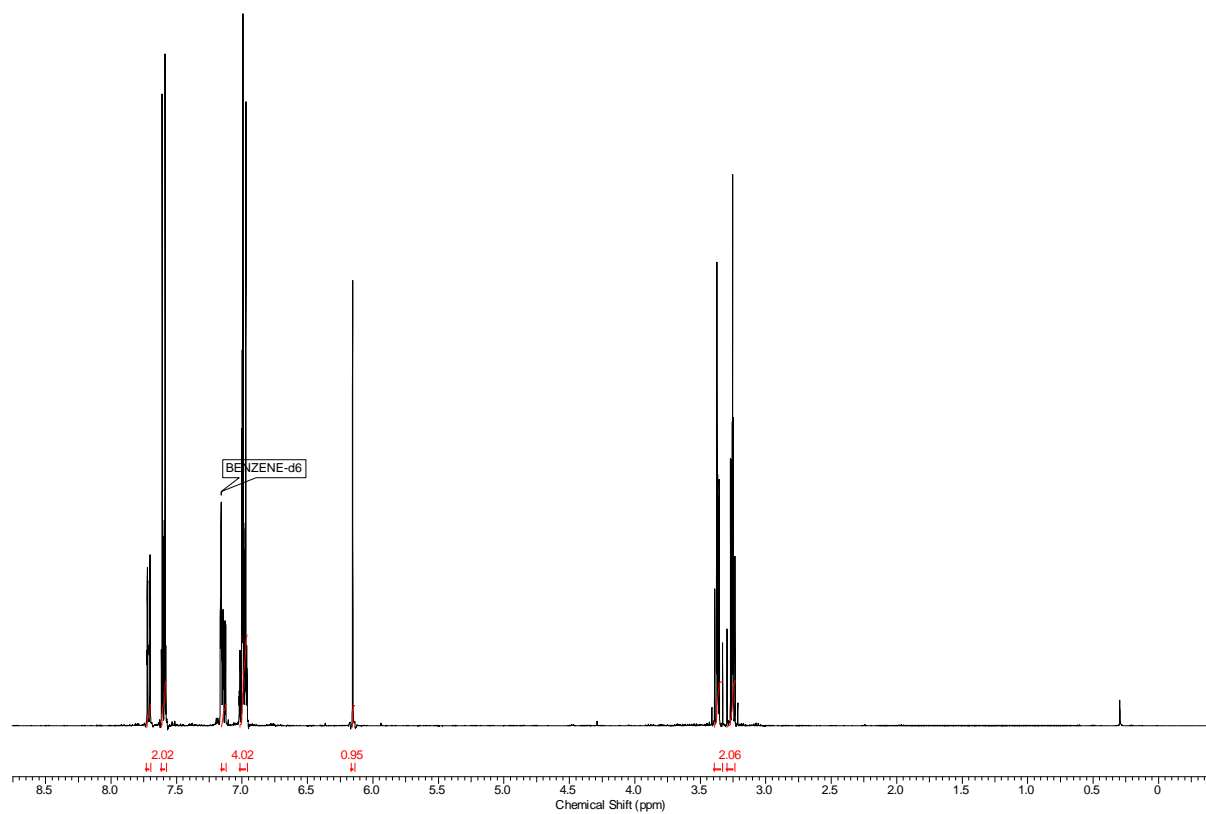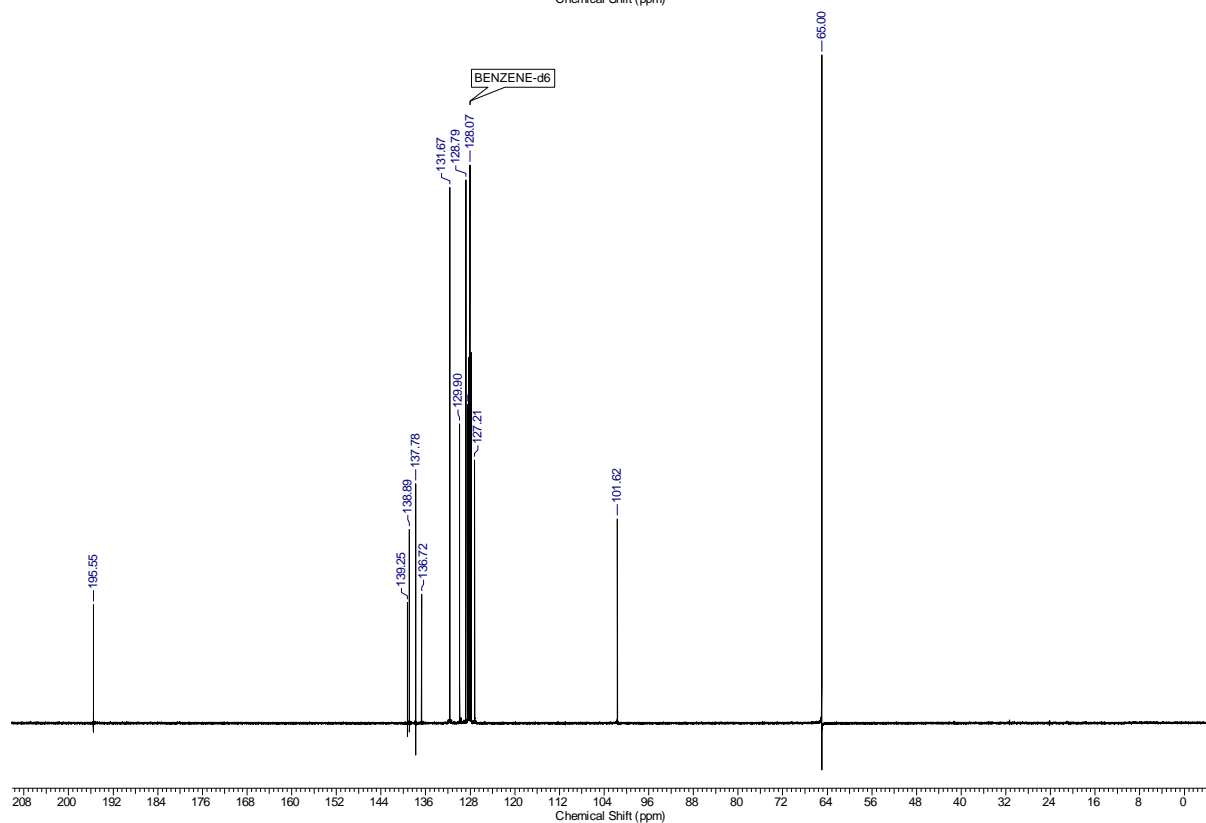

### Compound 11

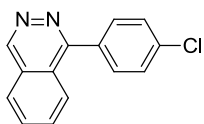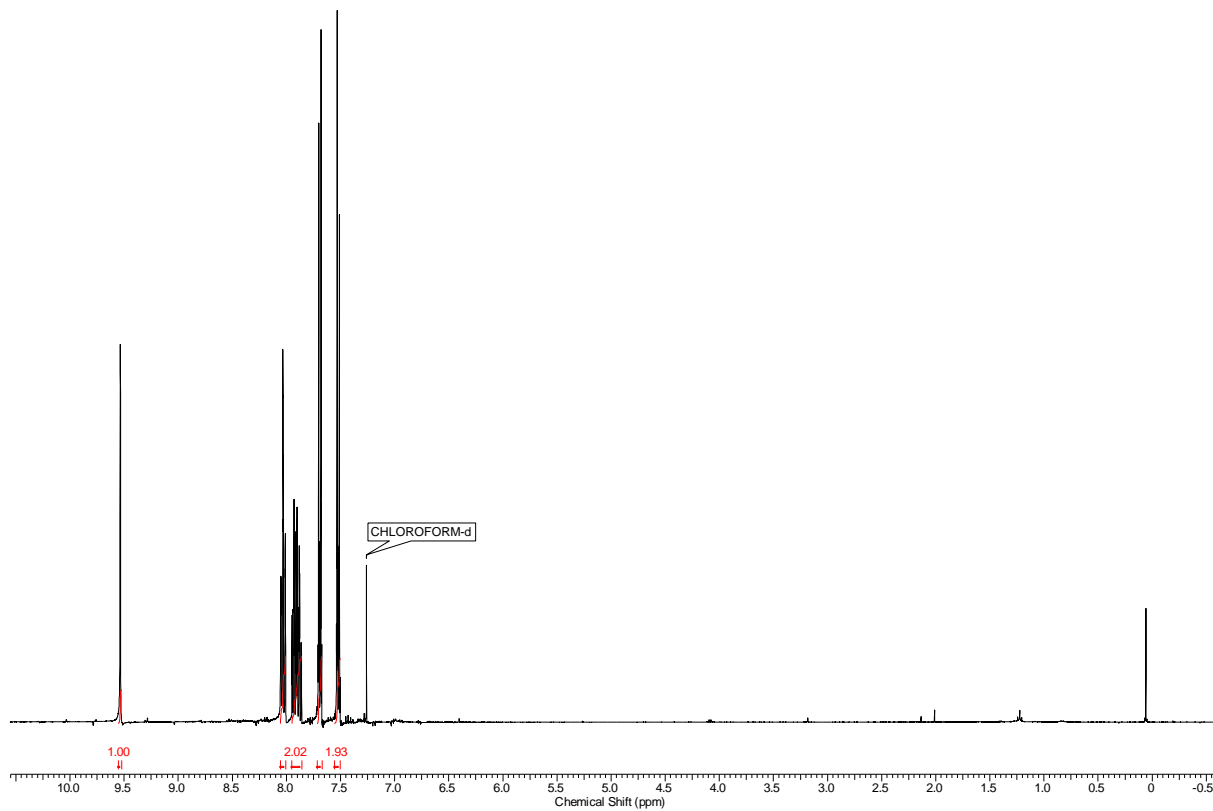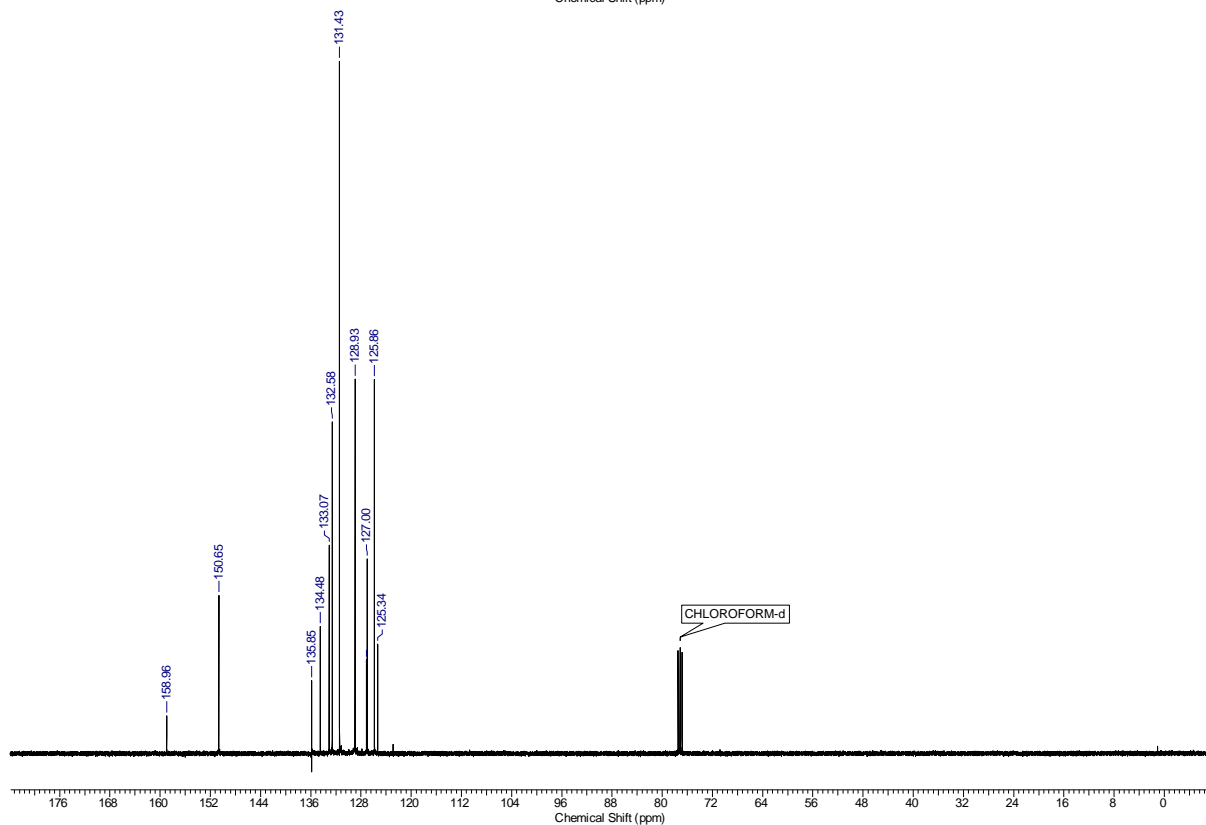

### Compound 14

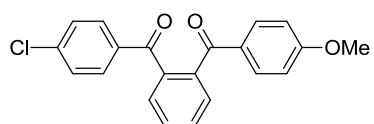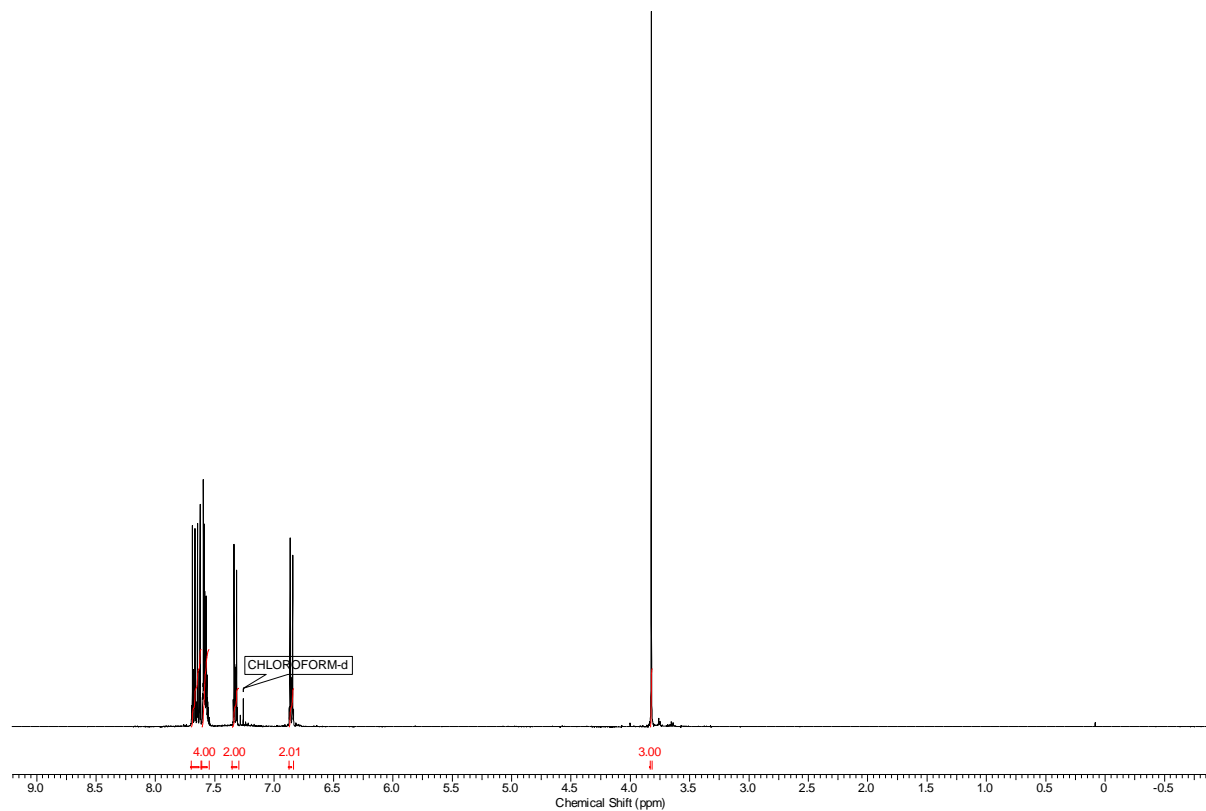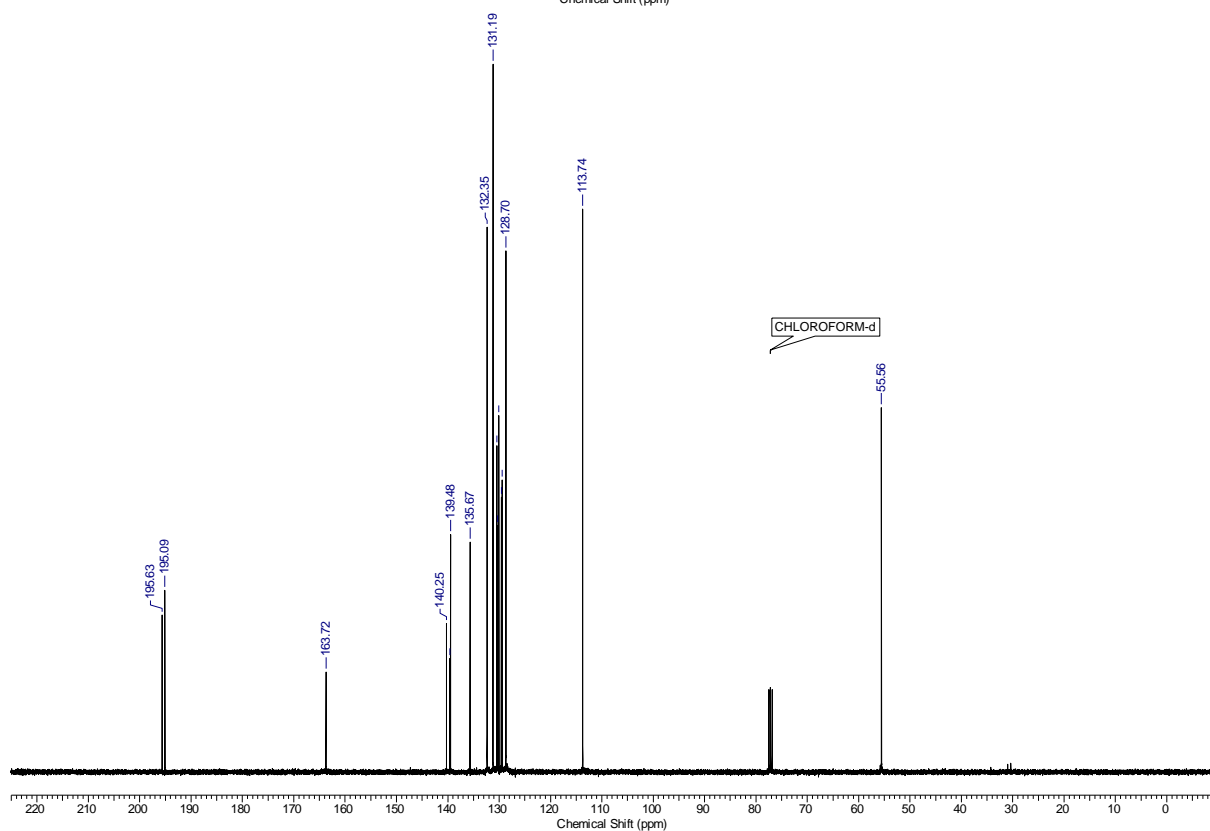

Supplement: c3cc43356k_2.pdf [file c3cc43356k_2.pdf]
